# Supplementary material
Source: publisher figshare collection journal article supplement (https://karger.figshare.com/articles/dataset/_/5455117)
Supplement: Supplementary file 1 [file 1]

**Supplementary Table S1.** Primer sequences used for reverse transcription–polymerase chain reaction

| Gene name   | Forward primer (5'–3')  | Reverse primer (5'–3')   | T <sub>m</sub> | No. cycles |
|-------------|-------------------------|--------------------------|----------------|------------|
| CYP27B1     | gggcctatctgtgcttgacc    | tgtcagtgaacactgtaagcatgg | 60             | 35         |
| Megalin     | aacggtcagtgattccgagcgaa | ttggcagtcgtcatctccatcaca | 55             | 35         |
| Cubilin     | agggacacaaggaaccttgccta | gtctttgctgcagtcattgtggct | 55             | 40         |
| GAPDH       | aagagagaggccctcagttg    | ctcctgttggtatggggctctg   | 55             | 35         |
| Osteopontin | ctgtctcccgggtgaaagtg    | gtcatccgtttcttcagagg     | 60             | 20         |
| Osteocalcin | ctgcattctgcctctctgacct  | gccggagtctattcaccacctt   | 58             | 35         |
| Sox9        | acggctccagcaagaacaag    | ttgtgcagatgcgggtactg     | 55             | 30         |
| BMP-7       | agacgccaaagaaccaagag    | gctgtcgtcgaagtagagga     | 60             | 35         |

T<sub>m</sub>, annealing temperature; CYP27b1, cytochrome P450 family 27 subfamily B polypeptide 1; GAPDH, glyceraldehyde-3-phosphate dehydrogenase; Sox9, SRY-box containing gene 9; BMP-7, bone morphogenetic protein 7.

**Supplementary Table S2.** Bone mineral density of adenine-fed rats

|                            | AC                        | Transplanted              | Normal      |
|----------------------------|---------------------------|---------------------------|-------------|
| tBMD (mg/cm <sup>3</sup> ) | 373.5 ± 19.0 <sup>a</sup> | 371.5 ± 24.9 <sup>a</sup> | 476.4 ± 4.5 |
| CBT (μm)                   | 599 ± 13 <sup>b</sup>     | 611 ± 14                  | 604 ± 9     |

Data are the mean ± s.d. <sup>a</sup>*P* < 0.0001 compared with the corresponding normal group;

<sup>b</sup>*P* < 0.05 compared with the corresponding transplanted group. Differences between adenine control (AC) and Transplanted groups were tested by unpaired *t*-test.

tBMD, total bone mineral density; CBT, cortical bone thickness.
