# Supplementary material
Source: publisher figshare collection journal article supplement (https://karger.figshare.com/articles/dataset/_/5455117)
Supplement: Supplementary file 2 [file 1]

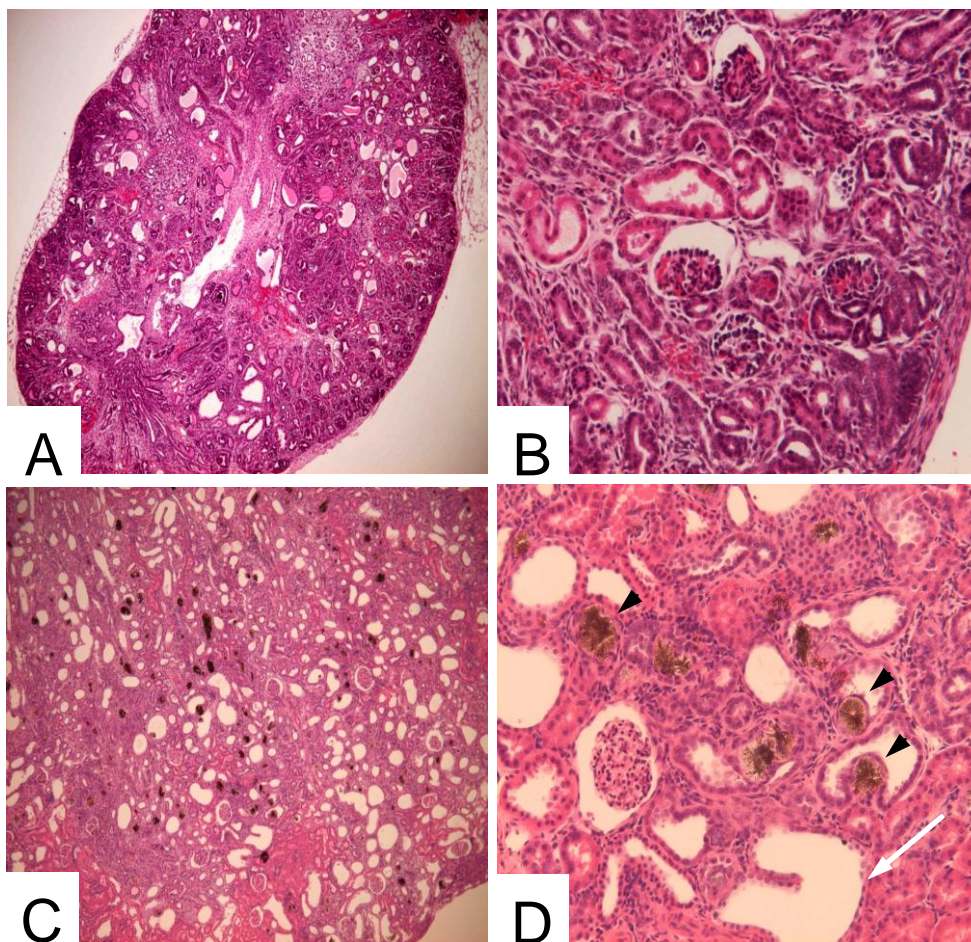

**Supplementary Fig. S1.** Implanted metanephroi 2 weeks after transplantation into the epididymis and histopathological findings of metanephroi and native kidneys in adenine-fed rats. (A,B) Metanephroi transplanted into the epididymis grew successfully, similar to those transplanted into the omentum. (Hematoxylin and eosin (HE) stain; original magnification ×40 (A) and ×200 (B).) (C,D) Adenine crystals in the tubules (black arrowheads), tubular dilatation (white arrow), and inflammatory cell infiltration in the interstitium of a kidney from an adenine-fed rat at 4 weeks. (HE stain; original magnification ×40 (C) and ×200 (D).)

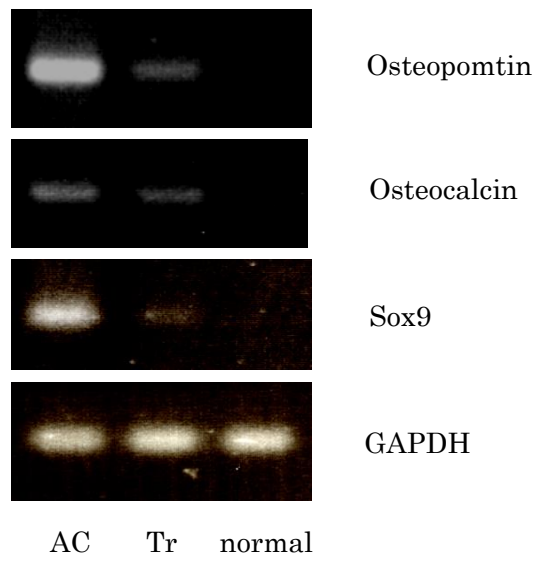

**Supplementary Fig. S2.** Reverse transcriptase-polymerase chain reaction for bone markers. AC, adenine control group; Tr, metanephros-transplanted group.

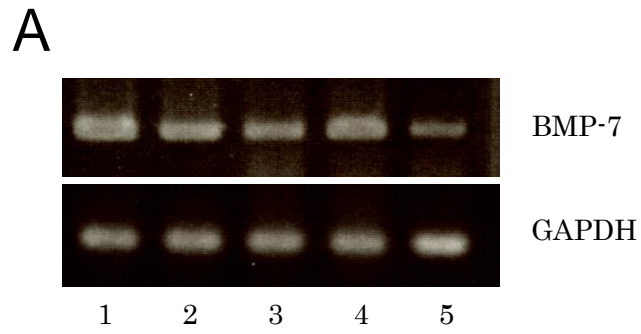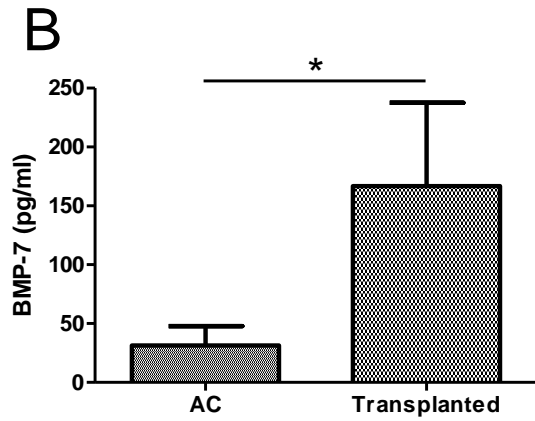

**Supplementary Fig. S3.** (A) Reverse transcriptase-polymerase chain reaction for bone morphogenetic protein (BMP)-7. Lanes 1, 2, rat embryonic day 15 metanephroi; lanes 3, 4, developed metanephroi in the transplanted group; lane 5, native kidney in the normal control group. (B) Serum BMP-7 levels in the adenine control (AC) and transplanted groups. Data are the mean  $\pm$  s.d.\* $P < 0.001$ . Differences between the AC and transplanted groups were tested by unpaired  $t$ -test.
