# Supplementary material
Source: publisher figshare collection journal article supplement (https://karger.figshare.com/articles/dataset/_/5455117)
Supplement: Supplementary file 3 [file 1]

Archive with 2 entries (2 files):
- 000332012_sm_Figures.pdf
- 000332012_sm_Tables.pdf
